# Supplementary material
Source: PubMed Central journal article supplement (PMC3032526)

Supplemental Figure 1

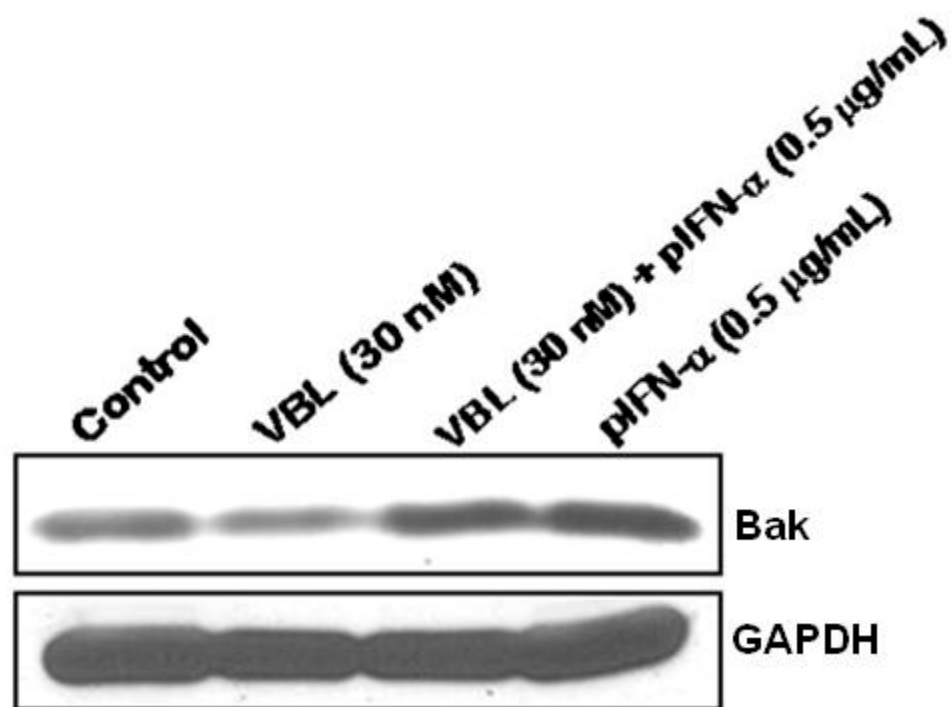

Supplemental Figure 2

**a**

**1 day**

**2 day**

**Continuous**

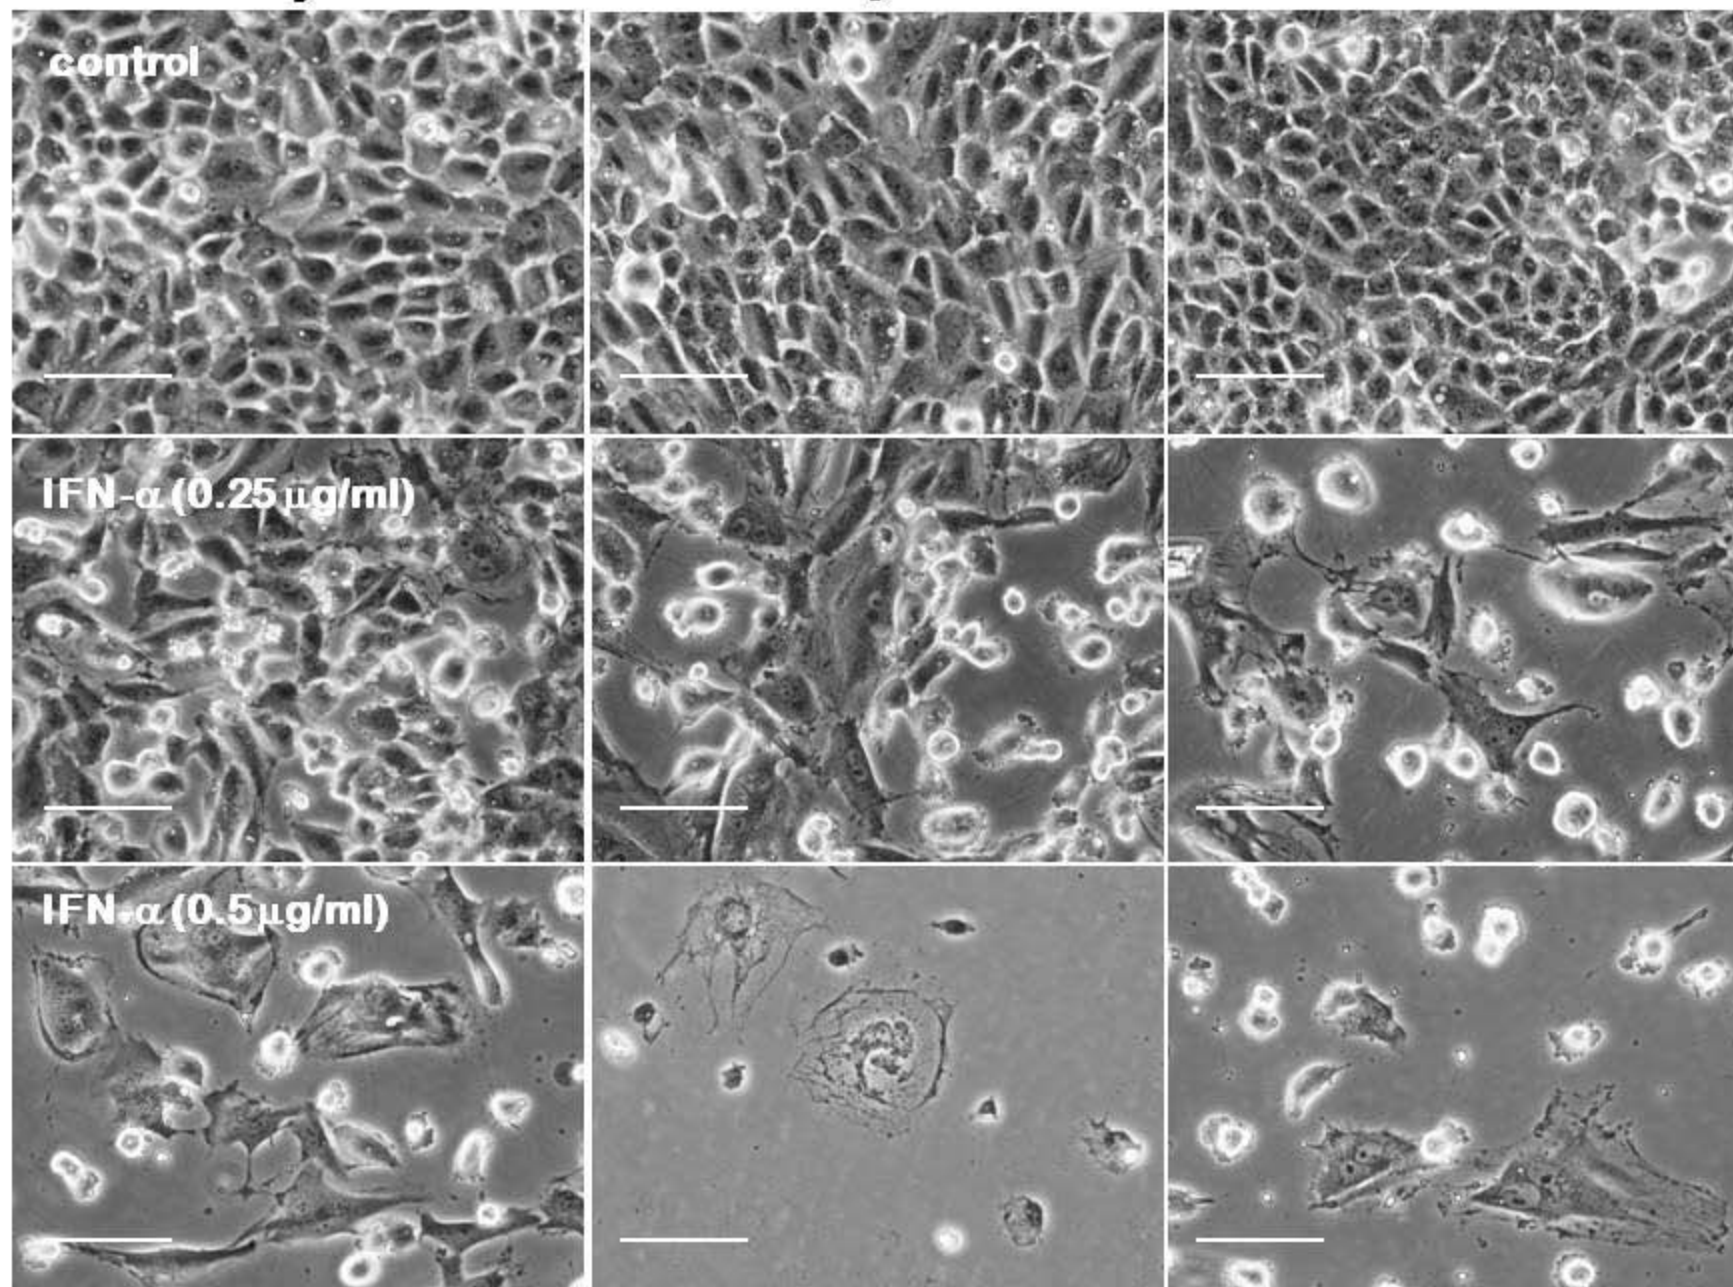

**b****1 day****2 day****Continuous**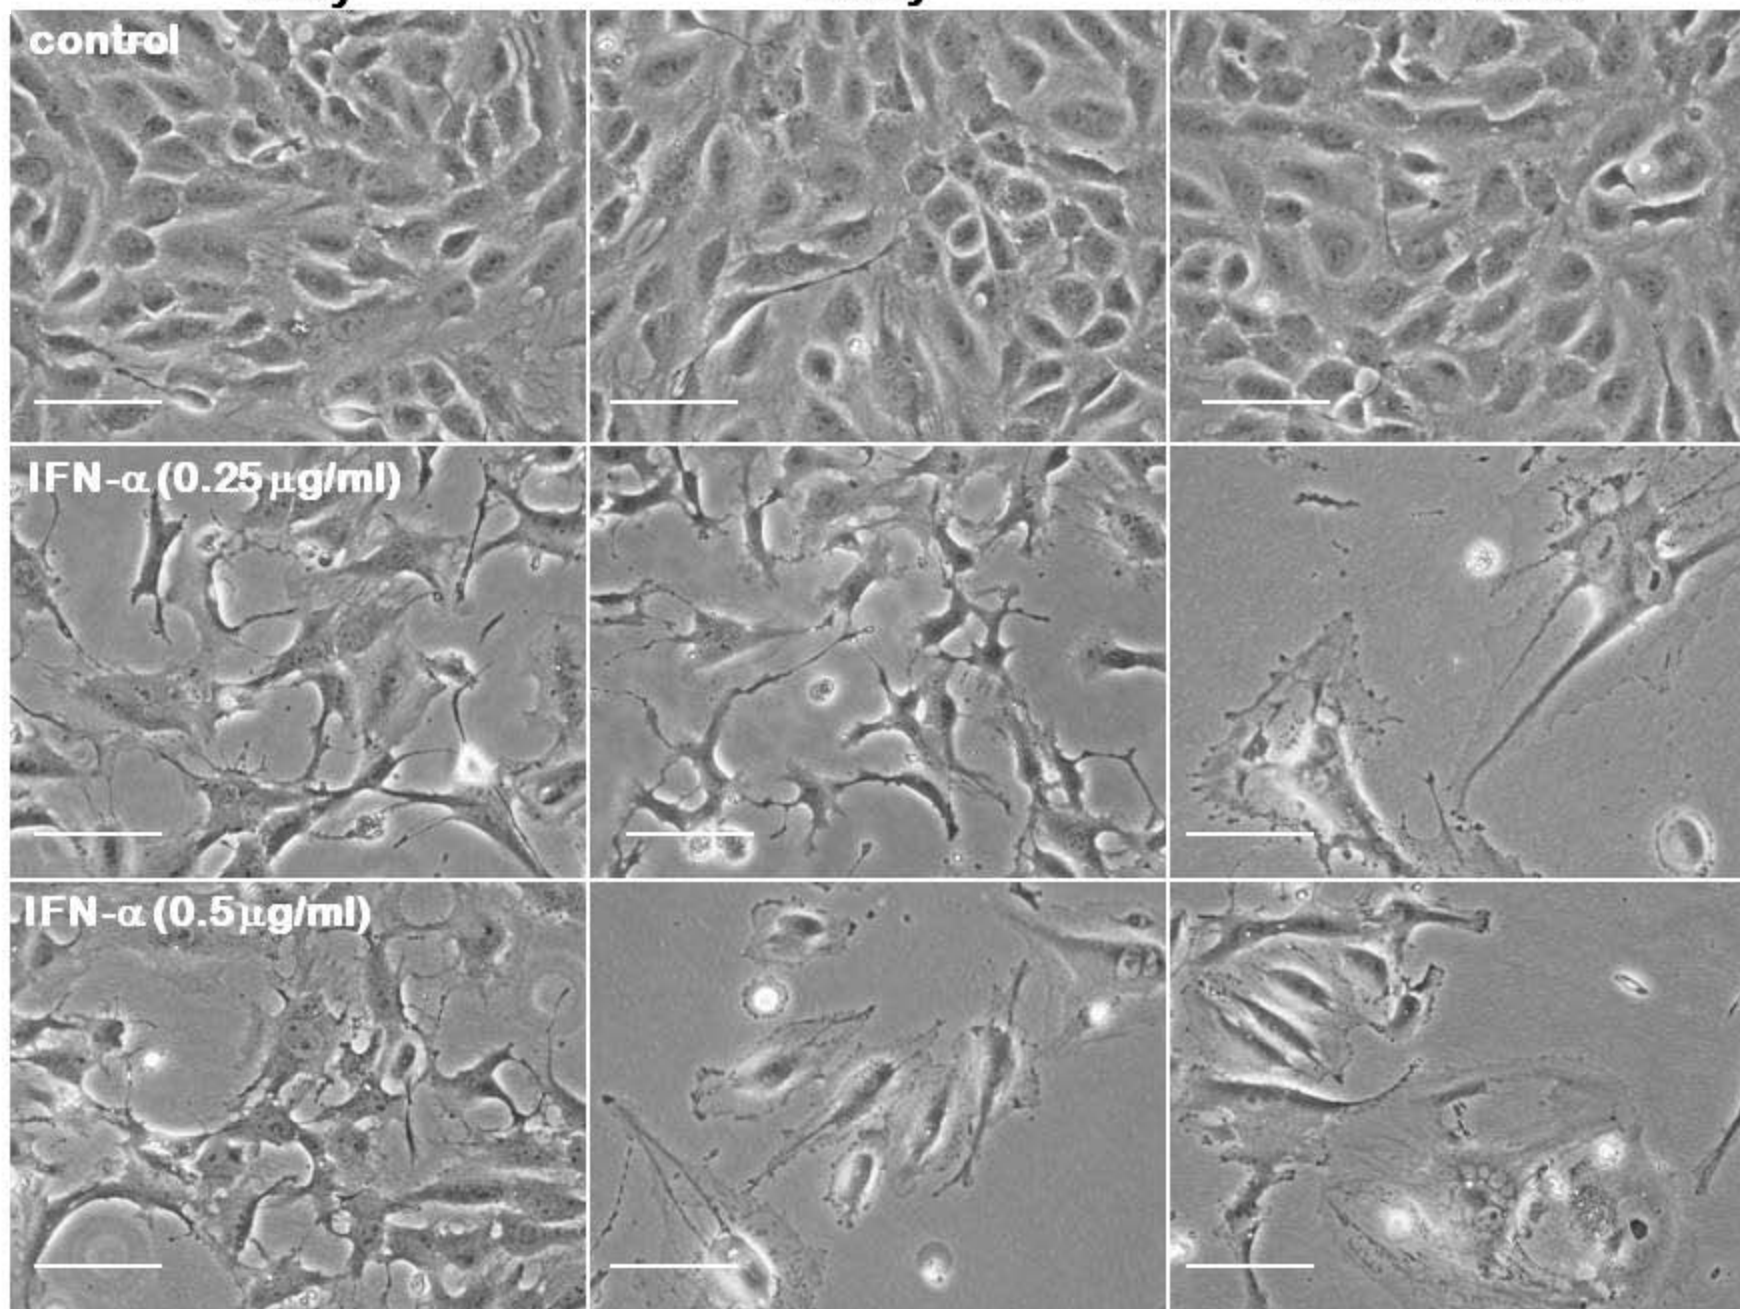

# Supplemental Figure 3

a

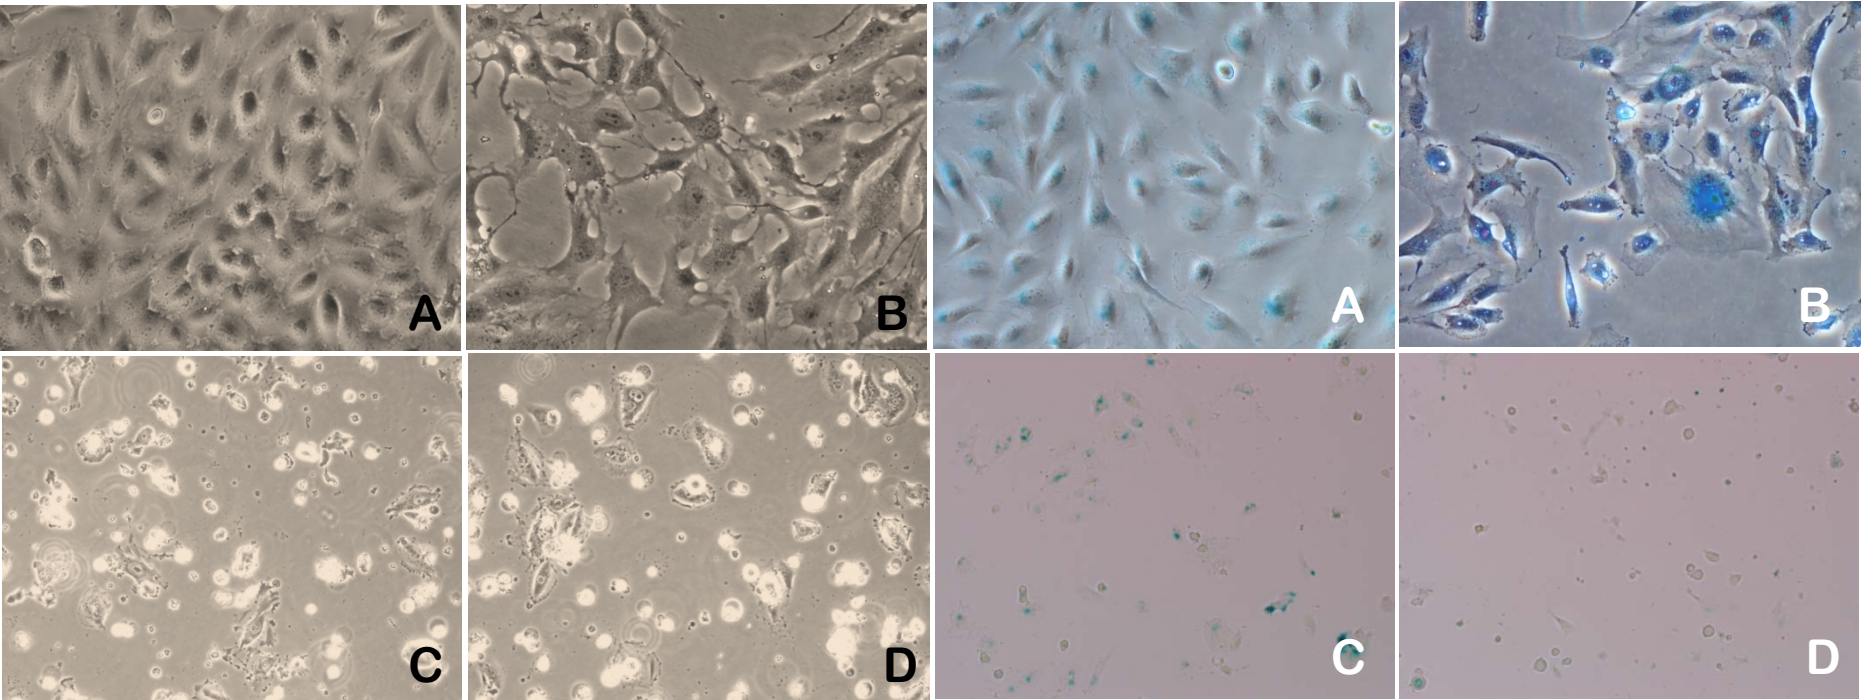

**Before Senescence associated  $\beta$ -galactosidase staining**

**After Senescence associated  $\beta$ -galactosidase staining**

**b**

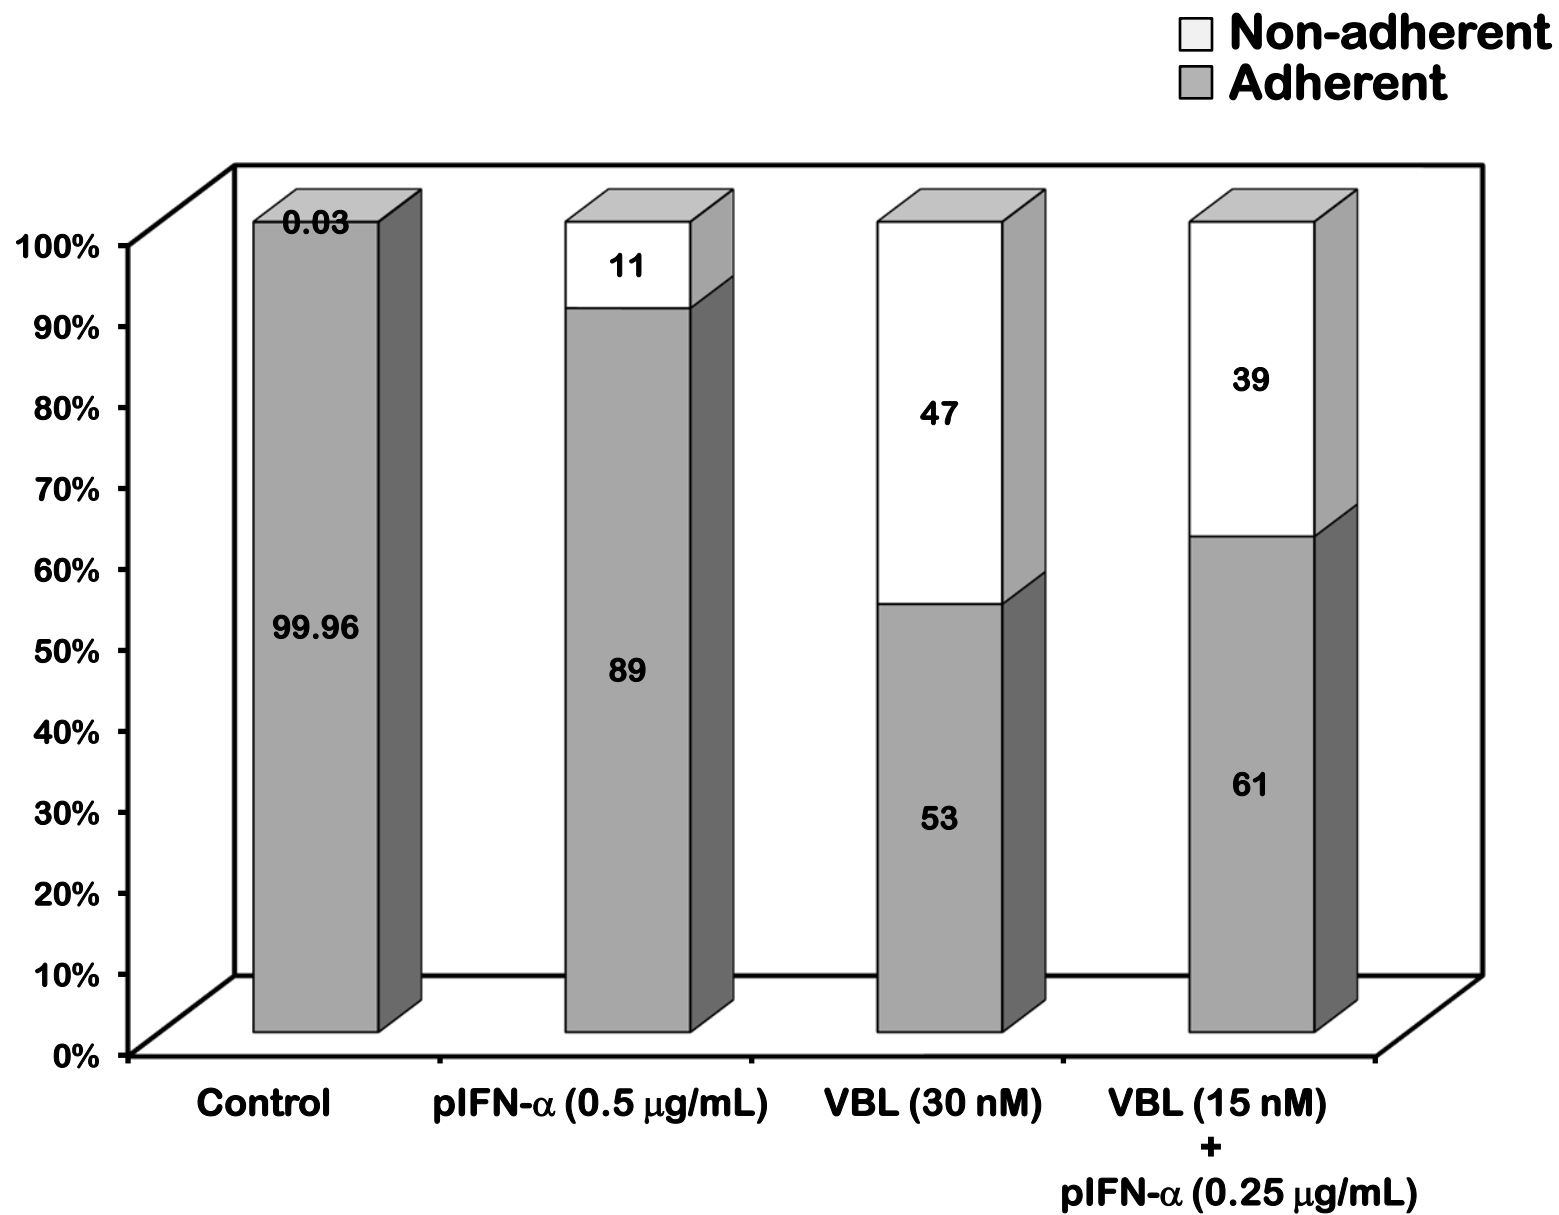

Supplement: cddis201043x1.pdf [file cddis201043x1.pdf]
